# Supplementary material for: Visualization of accessible cholesterol using a GRAM domain-based biosensor
Source: PubMed Central journal article supplement (PMC10600248; doi:10.1038/s41467-023-42498-7), 2023-10-25
Supplement: 41467_2023_42498_MOESM1_ESM.pdf [file 41467_2023_42498_MOESM1_ESM.pdf]

# Supplementary Information

## Visualization of accessible cholesterol using a GRAM domain-based biosensor

Dylan Hong Zheng Koh<sup>1</sup>, Tomoki Naito<sup>1</sup>, Minyoung Na<sup>1</sup>, Yee Jie Yeap<sup>1</sup>,  
Pritisha Rozario<sup>1</sup>, Franklin L. Zhong<sup>1,2</sup>, Kah-Leong Lim<sup>1,3</sup>, Yasunori Saheki<sup>1,4\*</sup>

<sup>1</sup>Lee Kong Chian School of Medicine, Nanyang Technological University, 308232, Singapore

<sup>2</sup>Skin Research Institute of Singapore (SRIS), Singapore, 308232, Singapore

<sup>3</sup>National Neuroscience Institute, Singapore, 308433, Singapore

<sup>4</sup>Institute of Resource Development and Analysis, Kumamoto University, Kumamoto, 860-0811, Japan

\*Address correspondence to: [yasunori.saheki@ntu.edu.sg](mailto:yasunori.saheki@ntu.edu.sg) (Y.S.)

- **Supplementary Figures 1–7**
- **Supplementary Table 1**

**a**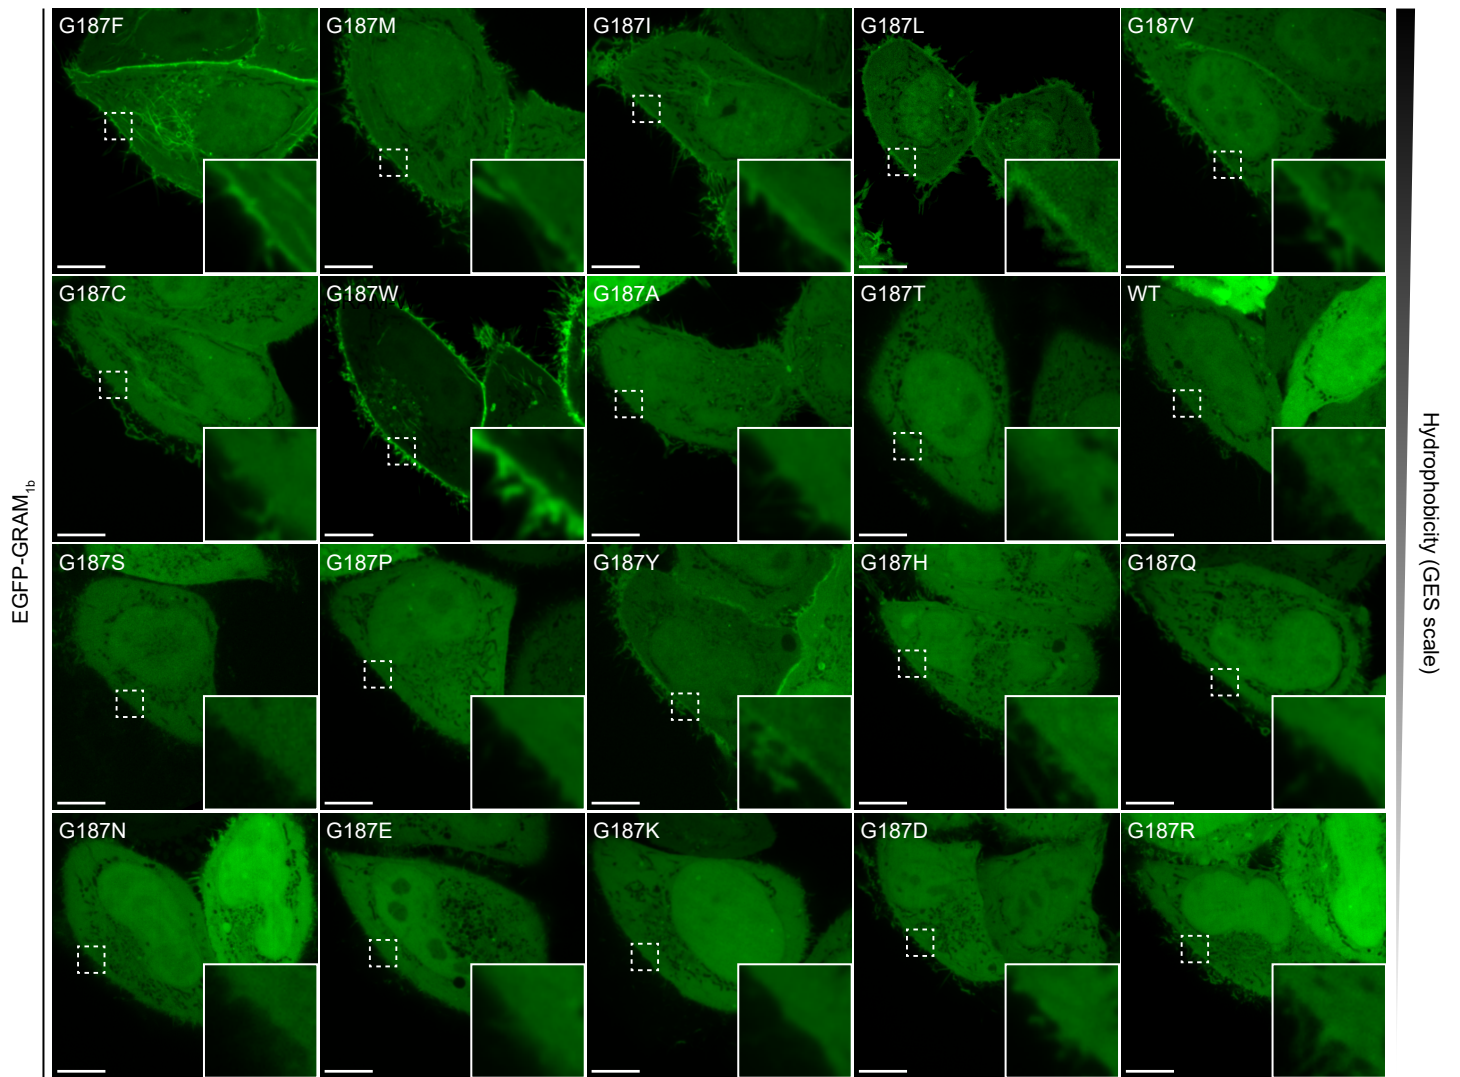**b**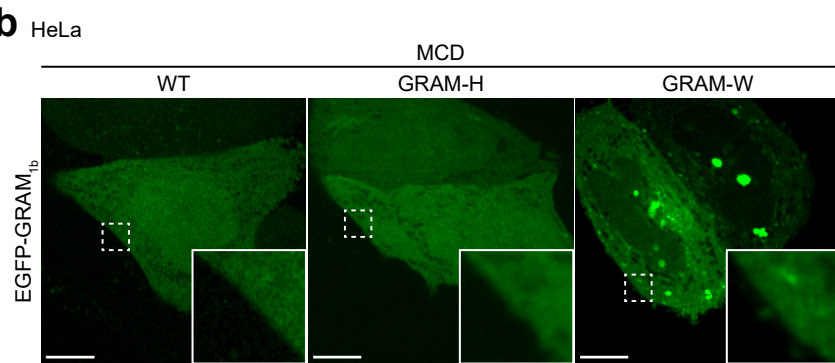**c**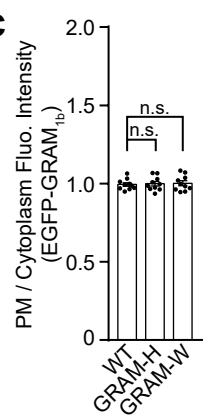**d**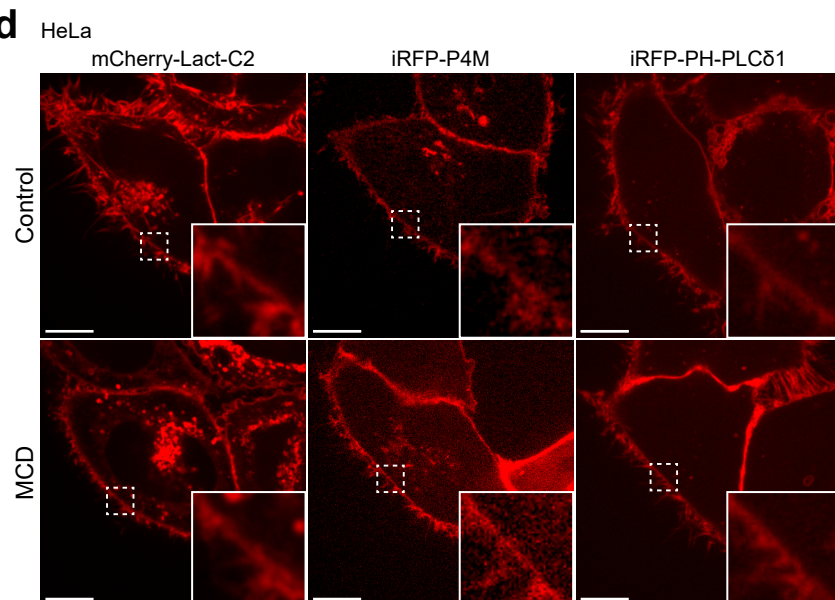**e**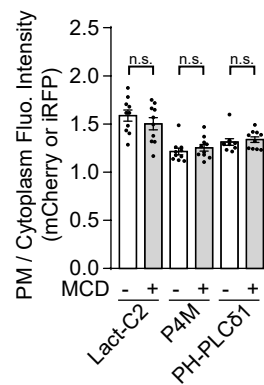

**Supplementary Fig. 1. Visualization of accessible cholesterol by a GRAM-W biosensor.** **a.** Confocal images of live HeLa cells expressing mutant versions of EGFP-tagged GRAM<sub>1b</sub> (EGFP-GRAM<sub>1b</sub>) as indicated. Insets show at higher magnification the regions indicated by white dashed boxes. Quantification of the ratio of PM signals to cytosolic signals of EGFP-GRAM<sub>1b</sub> is shown in Fig. 1b. Scale bars, 10  $\mu$ m. **b.** Confocal images of live HeLa cells expressing either wild-type EGFP-GRAM<sub>1b</sub> (WT), EGFP-tagged GRAM-H (GRAM-H), or EGFP-tagged GRAM-W (GRAM-W) as indicated. Cells were treated with MCD (5 mM) for 20 min before imaging. Insets show at higher magnification the regions indicated by white dashed boxes. Scale bars, 10  $\mu$ m. **c.** Quantification of the ratio of PM signals to cytosolic signals of EGFP-GRAM<sub>1b</sub>, as assessed by confocal microscopy and line scan analysis from HeLa cells expressing indicated constructs as shown in (b) (mean  $\pm$  SEM, n = 10 cells for each condition; data are pooled from one experiment; Dunnett's multiple comparisons test, n.s. denotes not significant). **d.** Confocal images of live HeLa cells expressing either mCherry-tagged Lact-C2 (mCherry-Lact-C2), iRFP-tagged P4M (iRFP-P4M), or iRFP-tagged PH-PLC $\delta$ 1 (iRFP-PH-PLC $\delta$ 1) as indicated. Cells were treated with or without MCD (5 mM) for 20 min before imaging. Insets show at higher magnification the regions indicated by white dashed boxes. Scale bars, 10  $\mu$ m. **e.** Quantification of the ratio of PM signals to cytosolic signals of mCherry-Lact-C2, iRFP-P4M, or iRFP-PH-PLC $\delta$ 1, as assessed by confocal microscopy and line scan analysis from HeLa cells expressing indicated constructs, with or without MCD treatment as shown in (d) (mean  $\pm$  SEM, n = 10 cells for each condition; data are pooled from one independent experiment; two-tailed unpaired Student's t-test, n.s. denotes not significant).

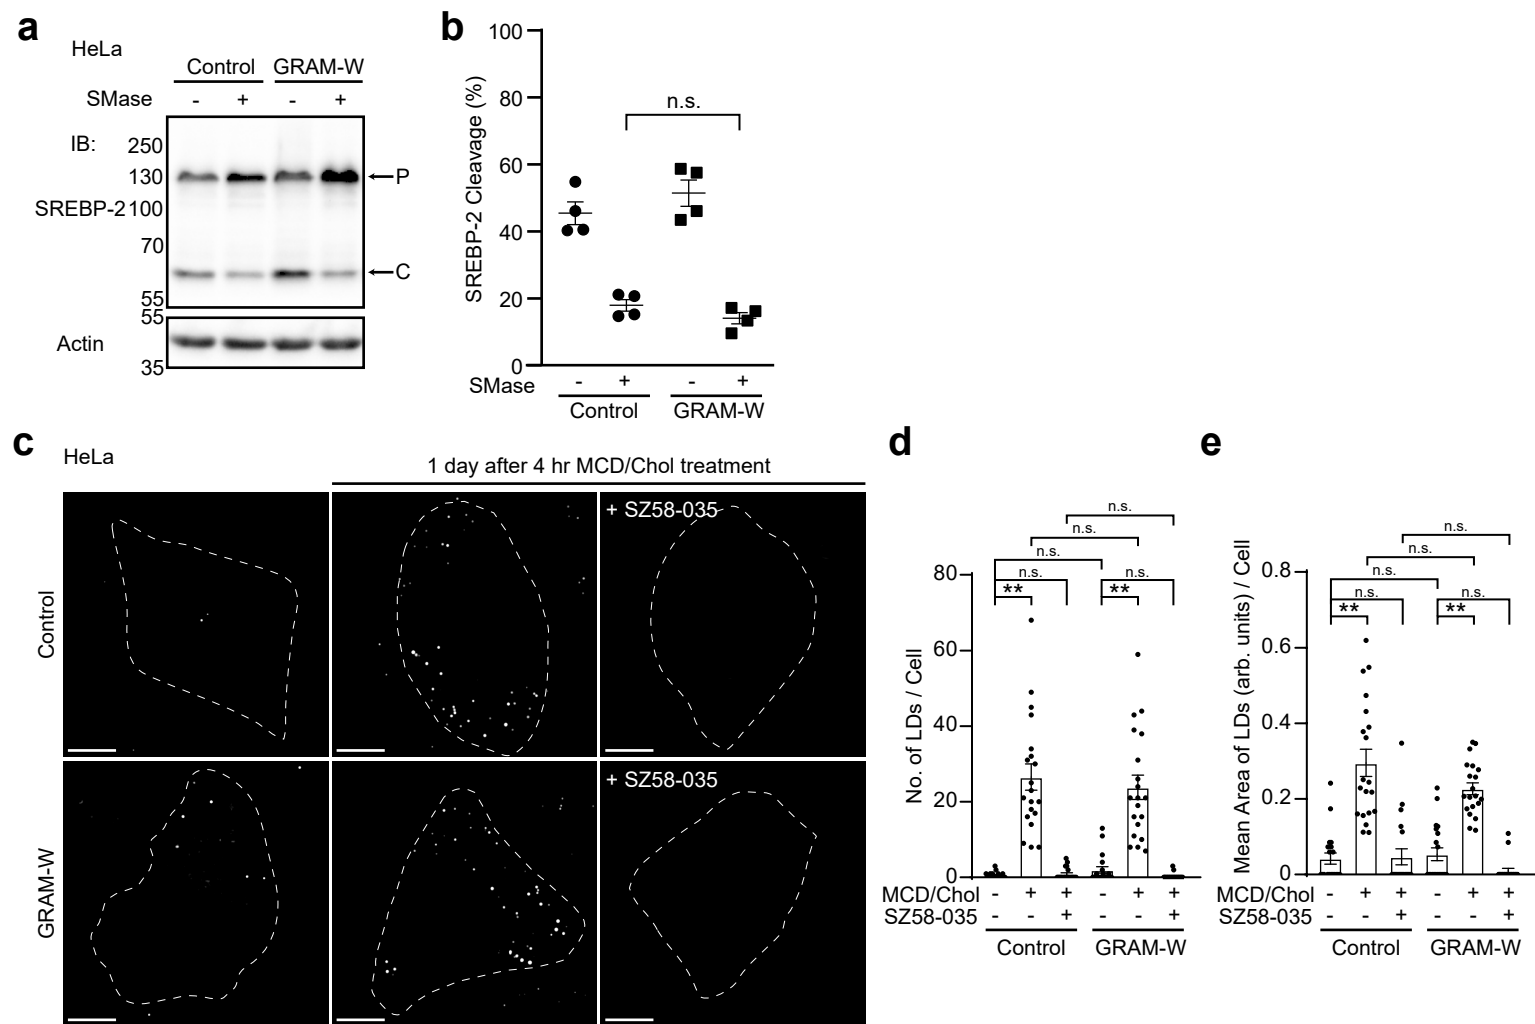

**Supplementary Fig. 2. Expression of GRAM-W does not impair intracellular movement of accessible cholesterol.** **a.** Lysates of wild-type HeLa cells (Control) or HeLa cells stably expressing EGFP-GRAM-W (GRAM-W) that were treated with or without 100 mU/ml sphingomyelinase (SMase) for 3 hrs and processed by SDS-PAGE and immunoblotted (IB) with anti-SREBP-2 and anti-actin antibodies. P, precursor form; C, cleaved form. **b.** Quantification of the percentage of the cleaved form of SREBP-2 [cleaved form / (cleave form + precursor form)] as analyzed in (a) ( $n = 4$  for each condition; two-tailed unpaired Student's t-test, n.s. denotes not significant). **c.** Confocal images of fixed wild-type HeLa cells (Control) and HeLa cells stably expressing EGFP-GRAM-W (GRAM-W) that were stained with LipidTOX to visualize lipid droplets (LDs). Cells were treated with MCD/Chol (200  $\mu$ M) for 4 hours. Medium were then replaced with culture medium with or without ACAT inhibitor, SZ58-035 (10  $\mu$ M), for 1 day before imaging. White dotted lines are drawn to depict the PM. Scale bars, 10  $\mu$ m. **d.** Quantification of the number of LDs stained by LipidTOX, as shown in (c) (mean  $\pm$  SEM,  $n = 20$  cells for each condition; data are pooled from one experiment; Tukey's multiple comparisons test,  $**P < 0.0001$ , n.s. denotes not significant). **e.** Quantification of the size of LDs stained by LipidTOX, as shown in (c) (mean  $\pm$  SEM,  $n = 20$  cells for each condition; data are pooled from one experiment; Tukey's multiple comparisons test,  $**P < 0.0001$ , n.s. denotes not significant).

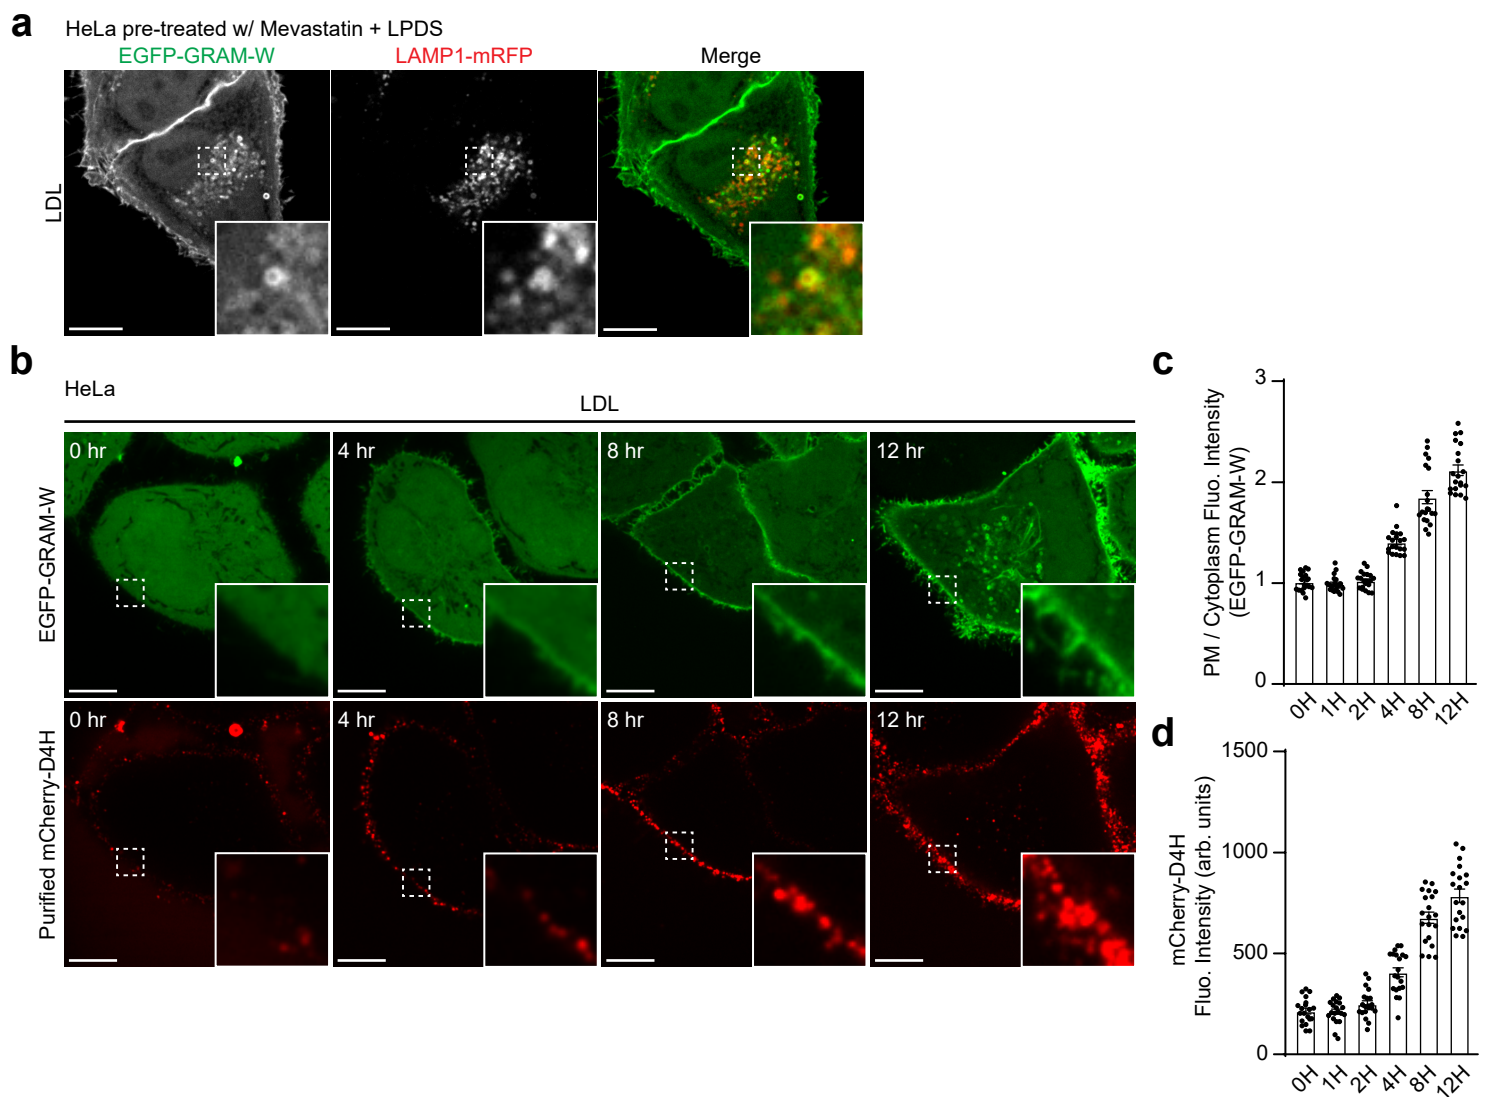

**Supplementary Fig. 3. GRAM-W detects LDL-derived accessible cholesterol in lysosomal membranes and the PM. a.** Confocal images of live HeLa cells expressing EGFP-GRAM-W and LAMP1-mRFP (lysosomal marker) that were stimulated by low-density lipoprotein (LDL) (50  $\mu\text{g}/\text{ml}$ ) for 12 hrs. Cells were pre-incubated in medium supplemented with mevastatin (50  $\mu\text{M}$ ) and 10% LPDS for 16 hrs to deplete cholesterol. Insets show at higher magnification the regions indicated by white dashed boxes. Same cells as shown in Fig. 2b. Experiments were repeated two times with similar results. Scale bars, 10  $\mu\text{m}$ . **b.** Confocal images of live HeLa cells stably expressing EGFP-GRAM-W that were stimulated by low-density lipoprotein (LDL) (50  $\mu\text{g}/\text{ml}$ ) for different periods of time as indicated. Cells were pre-incubated in medium supplemented with mevastatin (50  $\mu\text{M}$ ) and 10% LPDS for 16 hrs to deplete cholesterol. Live cells were stained with purified mCherry-D4H proteins (15  $\mu\text{g}/\text{ml}$  for 10 min) before imaging. Insets show at higher magnification the regions indicated by white dashed boxes. Note the similar timing of the increase in the binding of EGFP-GRAM-W and mCherry-D4H proteins to the PM upon LDL treatment. Scale bars, 10  $\mu\text{m}$ . **c.** Quantification of the ratio of PM signals to cytosolic signals of EGFP-GRAM-W, as assessed by confocal microscopy and line scan analysis as shown in (b) (mean  $\pm$  SEM,  $n = 20$  cells for each condition; data are pooled from two experiments; Dunnett's multiple comparisons test,  $**P < 0.0001$ ). **d.** Quantification of the mCherry-D4H signals, as assessed by confocal microscopy and line scan analysis as shown in (b) (mean  $\pm$  SEM,  $n = 20$  cells for each condition; data are pooled from two experiments; Dunnett's multiple comparisons test,  $**P < 0.0001$ ).

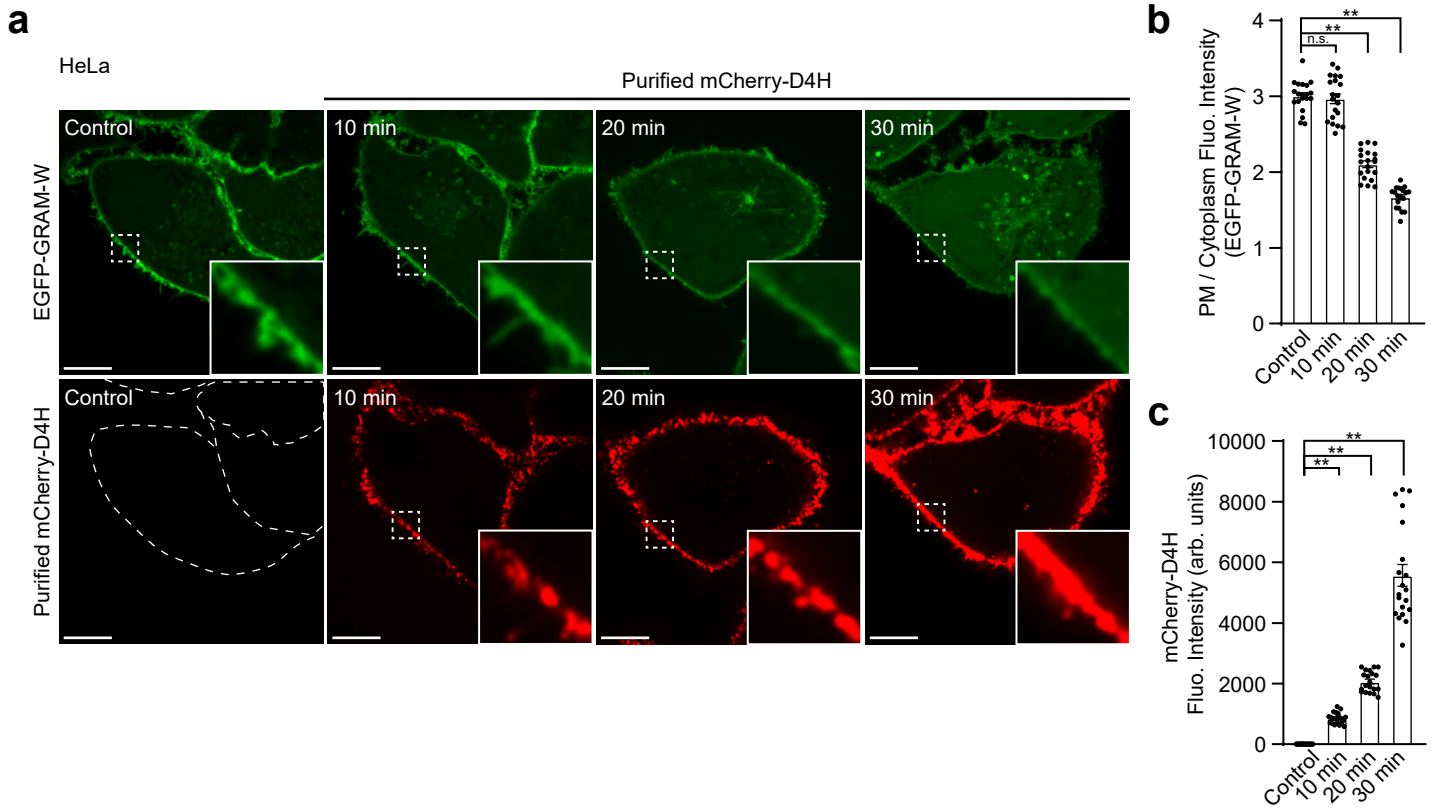

**Supplementary Fig. 4. Dissociation of EGFP-GRAM-W from the PM induced by accessible cholesterol trapping via purified mCherry-D4H proteins.** **a.** Confocal images of live HeLa cells stably expressing EGFP-GRAM-W that were stained with purified mCherry-D4H proteins (15  $\mu\text{g}/\text{ml}$ ) for indicated periods of time. White dotted lines are drawn to depict the PM. Insets show at higher magnification the regions indicated by white dashed boxes. Scale bars, 10  $\mu\text{m}$ . **b.** Quantification of the ratio of PM signals to cytosolic signals of EGFP-GRAM-W, as assessed by confocal microscopy and line scan analysis as shown in (a) (mean  $\pm$  SEM,  $n = 20$  cells for each condition; data are pooled from two experiments; Dunnett's multiple comparisons test,  $**P < 0.0001$ . n.s. denotes not significant). **c.** Quantification of the mCherry-D4H signals, as assessed by confocal microscopy and line scan analysis as shown in (a) (mean  $\pm$  SEM,  $n = 20$  cells for each condition; data are pooled from two experiments; Dunnett's multiple comparisons test,  $**P < 0.0001$ ).

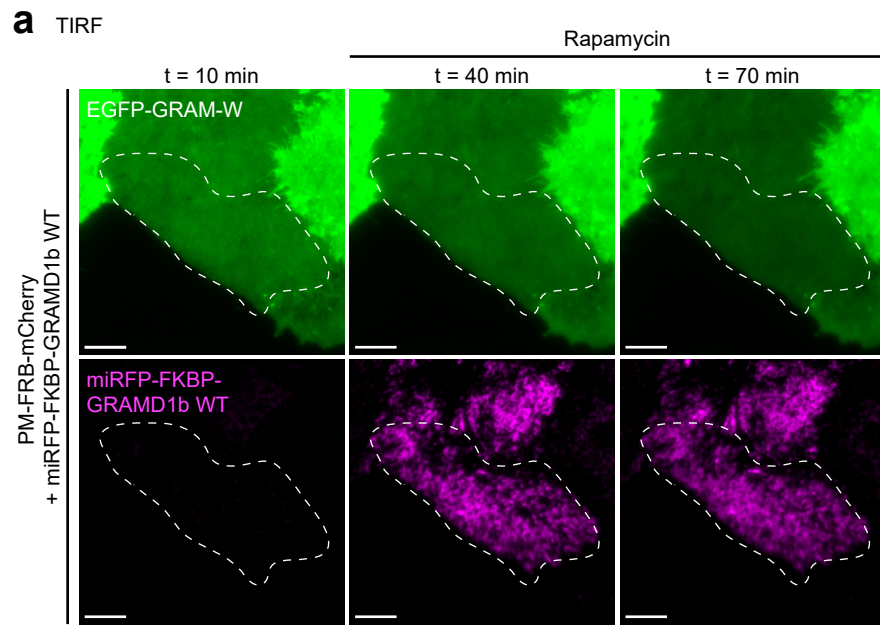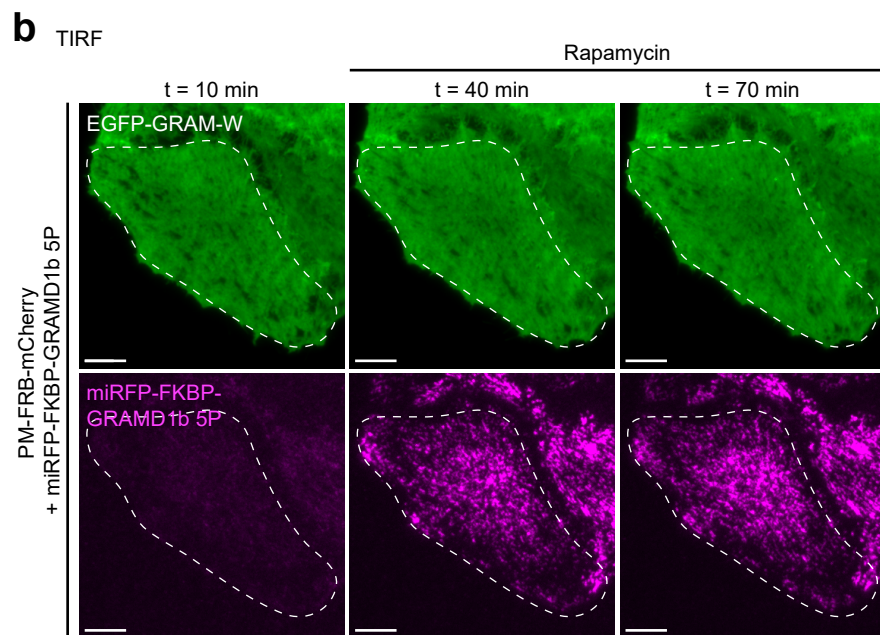

**Supplementary Fig. 5. GRAM-W detects reduction of accessible PM cholesterol mediated by rapamycin-dependent recruitment of GRAMD1b to ER-PM contacts.** **a.** TIRF images of live HeLa cells expressing EGFP-GRAM-W together with miRFP-FKBP-GRAMD1b (WT) and PM-FRB-mCherry. Cells were treated with rapamycin (200 nM) as indicated. White dotted lines are drawn to depict the PM. Note the gradual decrease in the signals of EGFP-GRAM-W at the PM upon rapamycin-induced recruitment of miRFP-FKBP-GRAMD1b (WT) to the PM. Quantification of normalized EGFP signals and that of normalized miRFP signals are shown in Fig. 3c, e, respectively. Scale bars, 10  $\mu$ m. **b.** TIRF images of live HeLa cells expressing EGFP-GRAM-W together with miRFP-FKBP-GRAMD1b (5P) and PM-FRB-mCherry. Cells were treated with rapamycin (200 nM) as indicated. White dotted lines are drawn to depict the PM. Note the absence of significant changes in the signals of EGFP-GRAM-W at the PM upon rapamycin-induced recruitment of miRFP-FKBP-GRAMD1b (5P) to the PM. Quantification of normalized EGFP signals and that of normalized miRFP signals are shown in Fig. 3c, e, respectively. Scale bars, 10  $\mu$ m.

**a**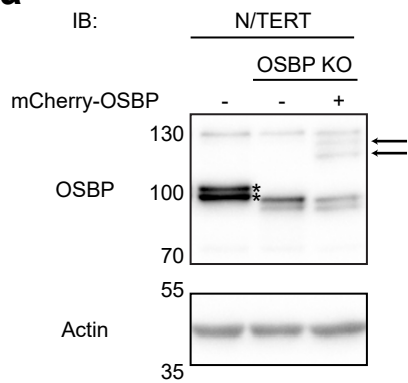

**Supplementary Fig. 6. GRAM-W uncovers contribution of OSBP to accessible cholesterol distribution in keratinocytes. a.** Lysates of wild-type N/TERT (Control), OSBP KO N/TERT, and OSBP KO N/TERT stably expressing mCherry-OSBP as indicated that were processed by SDS-PAGE and immunoblotted (IB) with anti-OSBP and anti-actin antibodies. Asterisks indicate endogenous OSBP; arrowheads indicate mCherry-OSBP. Experiments were repeated two times with similar results.



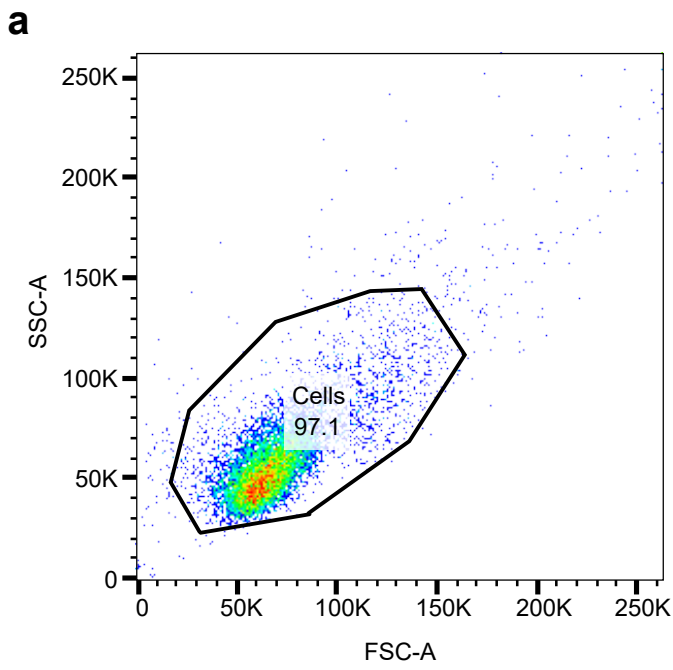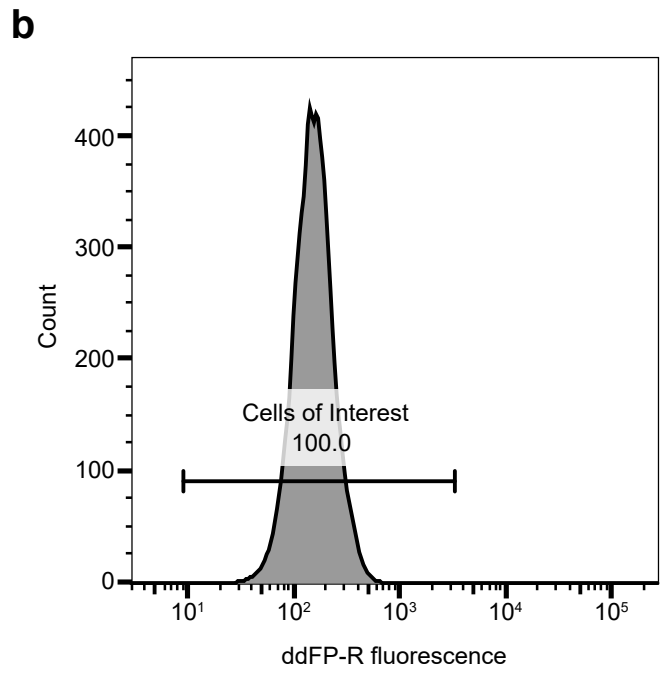

**Supplementary Fig. 7. Gating strategy.** **a.** The population of cells was gated in a forward vs side scatter plot. **b.** Cells from (a) were then displayed as a histogram showing the fluorescent intensity of ddFP-R-GRAM-W for Fig. 7i-k or ddFP-R-GRAM-H for Fig. 7l-n, following cell count normalization.

**Supplementary Table 1**

| REAGENT or RESOURCE                                                                                           | SOURCE                   | IDENTIFIER       |
|---------------------------------------------------------------------------------------------------------------|--------------------------|------------------|
| <b>Antibodies</b>                                                                                             |                          |                  |
| Anti-OSBP (1:1,000 dilution for WB)                                                                           | Sigma-Aldrich/Merck      | RRID:AB_2676401  |
| Anti-Actin (1:1,000 dilution for WB)                                                                          | EMD Millipore            | RRID:AB_2223041  |
| Anti-SREBP-2 (1:1,000 dilution for WB)                                                                        | Santa Cruz Biotechnology | RRID: AB_2194250 |
| Anti-TH (1:500 dilution for IF)                                                                               | Sigma-Aldrich/Merck      | RRID: AB_297840  |
| Anti-MAP2 (1:500 dilution for IF)                                                                             | Sigma-Aldrich/Merck      | RRID: AB_2138153 |
| Goat anti-Rabbit IgG (H+L) Highly Cross-Adsorbed Secondary Antibody, Alexa Fluor™ 594 (1:500 dilution for IF) | Thermo Fisher Scientific | RRID: AB_2534095 |
| Goat anti-Chicken IgY (H+L) Cross-Adsorbed Secondary Antibody, Alexa Fluor™ 633 (1:500 dilution for IF)       | Thermo Fisher Scientific | RRID: AB_2535756 |
| Goat Anti-Rabbit IgG (H+L)-HRP Conjugate (1:5,000 dilution for WB)                                            | Bio Rad                  | RRID:AB_11125142 |
| Goat Anti-Rabbit IgG (H+L)-HRP Conjugate (1:5,000 dilution for WB)                                            | Bio Rad                  | RRID:AB_11125547 |
| <b>Bacterial Strains</b>                                                                                      |                          |                  |
| E. coli BL21-DE3 Rosetta                                                                                      |                          |                  |
| <b>Chemicals, Peptides, and Recombinant Proteins</b>                                                          |                          |                  |
| 1,2-dioleoyl-sn-glycero-3-phosphocholine (DOPC)                                                               | Avanti Polar Lipids      | 850375           |
| 1,2-dioleoyl-sn-glycero-3-phospho-L-serine (sodium salt) (DOPS)                                               | Avanti Polar Lipids      | 840035           |
| 2-Mercaptoethanol                                                                                             | Gibco                    | 21985023         |
| Ascorbic Acid                                                                                                 | Stemcell Technologies    | 72132            |
| B-27™ Supplement minus vitamin A                                                                              | Gibco                    | 12587010         |
| Benzonase® Nuclease                                                                                           | Santa Cruz Biotechnology | sc-202391        |
| Blasticidine S Hydrochloride                                                                                  | Sigma-Aldrich/Merck      | 15205            |
| Bovine Pituitary Extract (BPE)                                                                                | Gibco                    | 17005042         |
| CHIR99021                                                                                                     | Tocris                   | 4423/10          |
| Cholesterol                                                                                                   | Sigma-Aldrich/Merck      | C8667            |
| Colloidal Blue Staining Kit                                                                                   | Thermo Fisher Scientific | LC6025           |
| cOmplete™, EDTA-free Protease Inhibitor Cocktail                                                              | Sigma-Aldrich/Merck      | 11873580001      |
| Cultrex Stem Cell Qualified Human Fibronectin                                                                 | RnD Systems              | 3420-001-03      |
| Cultrex Stem Cell Qualified Laminin I                                                                         | RnD Systems              | 3400-010-03      |
| DAPT                                                                                                          | Tocris                   | 2634/10          |
| Dibutyryl cAMP                                                                                                | Santa Cruz               | sc-201567B       |
| DMEM (4.5g/l Glucose) with L-Gln, without Sodium Pyruvate                                                     | Nacalai Tesque, Japan    | 08459-35         |
| DNase                                                                                                         | Sigma-Aldrich/Merck      | DN25             |
| Fetal Bovine Serum                                                                                            | Gibco                    | 10270-106        |
| Geneticin (G418 Sulfate)                                                                                      | Gibco                    | 10131027         |
| GlutaMAX™ Supplement                                                                                          | Gibco                    | 35050061         |
| HCS LipidTOX™ Red Neutral Lipid Stain, for cellular imaging                                                   | Thermofisher             | H34476           |

|                                               |                          |               |
|-----------------------------------------------|--------------------------|---------------|
| HisPur™ Ni-NTA Resin                          | ThermoFisher             | 88222         |
| Human Recombinant EGF                         | Gibco                    | 17005042      |
| Isopropyl-1-thio-B-d-galactopyranoside (IPTG) | ThermoFisher             | R0392         |
| Keratinocyte SFM (1X)                         | Gibco                    | 17005042      |
| KnockOut™ DMEM/F-12                           | Gibco                    | 12660012      |
| KnockOut™ Serum Replacement                   | Gibco                    | 10828010      |
| LDN193189                                     | Tocris                   | 6053/10       |
| Lipofectamine 2000 Reagent                    | Thermo Fisher Scientific | 11668-019     |
| Lipoprotein Deficient Serum (LPDS)            | Sigma-Aldrich/Merck      | S5394         |
| Low Density Lipoprotein (LDL)                 | Stemcell technologies    | 02698         |
| Lysozyme from chicken egg white               | Sigma-Aldrich/Merck      | 62970         |
| Matrigel™ hESC-Qualified Matrix, LDEV-free    | Corning                  | 354277        |
| MEM Non-Essential Amino Acids Solution (100X) | Gibco                    | 11140050      |
| Methyl-β-cyclodextrin                         | Sigma-Aldrich/Merck      | C4555         |
| Mevastatin                                    | Santa Cruz               | sc-200853A    |
| N-2 Supplement                                | Gibco                    | 17502001      |
| Neurobasal™ Medium                            | Gibco                    | 21103049      |
| Opti-MEM™ I Reduced Serum Medium              | Thermo Fisher Scientific | 31985070      |
| OSW-1                                         | Cayman Chemical          | 30310         |
| Phorbol-12-myristate-13-acetate (PMA)         | Sigma-Aldrich/Merck      | P8139         |
| Poly-L-Ornithine                              | Sigma-Aldrich            | P4957         |
| Purmorphamine                                 | Tocris                   | 4551/10       |
| Puromycin                                     | Stemcell                 | 73342         |
| Rapamycin                                     | Sigma-Aldrich/Merck      | R0395         |
| Recombinant Human GDNF                        | Peprtech                 | 450-10        |
| Recombinant Human/Murine/Rat BDNF             | Peprtech                 | 450-02        |
| Recombinant mouse sonic hedgehog/Shh (C25II)  | RnD Systems              | 464-SH-025/CF |
| ReLeSR™                                       | Stemcell Technologies    | 05872         |
| RPMI 1640 with L-Gln and HEPES                | Nacalai Tesque, Japan    | 30263-95      |
| Sandoz 58-035                                 | Sigma-Aldrich/Merck      | S9318         |
| SB431542                                      | Tocris                   | 1614/10       |
| Sodium Bicarbonate (7.5%)                     | Gibco                    | 25080094      |
| Sphingomyelinase from Bacillus cereus (SMase) | Sigma-Aldrich/Merck      | S9396         |
| StemPro™ Accutase™                            | Gibco                    | A1110501      |
| Streptomycin/Penicillin                       | Gibco                    | 15140122      |
| TeSR™-E8™                                     | Stemcell Technologies    | 05990         |
| TGF-β3                                        | Peprtech                 | 100-36E       |
| Tris (2-carboxyethyl) phosphine (TCEP)        | Sigma-Aldrich/Merck      | C4706         |
| U18666A                                       | Sigma-Aldrich/Merck      | U3633         |
| Y-27632                                       | Stemcell Technologies    | 72308         |

| <b>Critical Commercial Assays</b>                   |                                  |                              |
|-----------------------------------------------------|----------------------------------|------------------------------|
| BCA Protein Assay Kit                               | NEB                              | 23225                        |
| Lenti-X GoStix Plus                                 | Takara Bio                       | 631281                       |
| NEBuilder HiFi DNA Assembly Cloning Kit             | NEB                              | E5520S                       |
| P3 Primary Cell 4D-Nucleofector™ X Kit S            | Lonza                            | V4XP-3032                    |
| Q5 Site-Directed Mutagenesis Kit                    | NEB                              | E0552S                       |
| Mycoguard™ Mycoplasma PCR Detection Kit             | GeneCopoeia, Inc.                | MP004                        |
| <b>Experimental Models: Cell Lines</b>              |                                  |                              |
| HeLa M                                              | Others                           | Gift from Pietro De Camilli  |
| HeLa M stably expressing EGFP-GRAM <sub>1b</sub> WT | This paper                       |                              |
| HeLa M stably expressing EGFP-GRAM-W                | This paper                       |                              |
| HeLa M stably expressing ddFP-R-GRAM-H              | This paper                       |                              |
| HeLa M stably expressing ddFP-R-GRAM-W              | This paper                       |                              |
| COS-7                                               | Others                           | Gift from Pietro De Camilli  |
| HEK293T                                             | Others                           | Gift from Nguan Soon Tan     |
| U2OS                                                | Others                           | Gift from Wenting Zhao       |
| N/TERT                                              | Others                           | Gift from James G. Rheinwald |
| N/TERT stably expressing EGFP-GRAM-W                | This paper                       |                              |
| THP-1                                               | Others                           | Gift from Franklin Lei Zhong |
| THP-1 stably expressing EGFP-GRAM-W                 | This paper                       |                              |
| asF5                                                | CellResearch Corporation Pte Ltd |                              |
| <b>Oligonucleotides</b>                             |                                  |                              |
| CACTTCGTTTTGGGCCCGGATA                              | This paper                       | GRAMD1b_G187W_F              |
| AAGAAGTGCTTTTCTGAATCAGTGC                           | This paper                       | GRAMD1b_G187W_R              |
| CAAAC TATAGTCTCAATTTATGG                            | This paper                       | OSBP_S416S_F                 |
| GCTTGTATGGTATTCTGG                                  | This paper                       | OSBP_S416S_R                 |
| TAATGAGCCCCTATCCATGCTTC                             | This paper                       | OSBP_L444L_F                 |
| AAGTTTACCGGCATGGGG                                  | This paper                       | OSBP_L444L_R                 |
| CCGAGCTACCGGTCATGGTGAGCAAGAGCGAGGAG<br>GTC          | This paper                       | Agel-RA-S                    |
| TTGAGCTCGAGAGGTACCCTTGTACAGCTCGTCCAT<br>G           | This paper                       | XhoI-RA-AS                   |

|                                                                                                                                                                                                                                                                                                                                                                                                                                                                                                                                                                                                                                                                                                                                                                                                                                                                                                                                                                                                                                                                                                                                                                                                                                                                                                   |                   |                                   |
|---------------------------------------------------------------------------------------------------------------------------------------------------------------------------------------------------------------------------------------------------------------------------------------------------------------------------------------------------------------------------------------------------------------------------------------------------------------------------------------------------------------------------------------------------------------------------------------------------------------------------------------------------------------------------------------------------------------------------------------------------------------------------------------------------------------------------------------------------------------------------------------------------------------------------------------------------------------------------------------------------------------------------------------------------------------------------------------------------------------------------------------------------------------------------------------------------------------------------------------------------------------------------------------------------|-------------------|-----------------------------------|
| <p>GGGCCTGAATTCGTGAGCAAGGGCGAGGAGACCAT<br/> CAAAGAGTTCATGCGCTTCAAGGTGCGCATGGAGGG<br/> CTCCATGAACGGCCACGAGTTCGAGATCGAGGGCG<br/> AGGGCGAGGGCCGCCCTACGAGGGCACCCAGAC<br/> CGCCAAGCTGAAGGTGACCAAGGGCGGCCCTGC<br/> CCTTCGCTGGGACATCCTGTCCCCCAGTTCATGT<br/> ACGGCTCCGAGGCGTACGTGAGGCACCCCGCCGAC<br/> ATCCCCGATTACAAGAAGCTGCCCTTCCCCGAGGGC<br/> TTCAAGTGGGAGCGCGTGATGAACTTCGAAGACGGC<br/> GGTCTGGTGACCGTTACCCAGGACTCCTCCCTGCAG<br/> GACGGCACGCTGATCTGCAAGGTGAAGATGCGCGG<br/> CACCAACTTCCCCCGACGGCCCCGTAATGCAGAA<br/> GAAGACCATGGGCTGGGAGGCCTCCACCGAGATGC<br/> TGTACCCCGAAGACGGCGTGCTGAAGGGCCATAGC<br/> TATCAGGCCCTGAAGCTGAAGGACGGCGGCCACTA<br/> CCTGGTGGAGTTTCGAGACCATCTACATGGCCAAGAA<br/> GCCCCGTGCAACTGCCCGGCGATTACTGTGTGGACA<br/> CCAAGCTGGACATCACCTCCCACAACGAGGACTACA<br/> CCATCGTGGAACAGTACGGGCGCTCCGAGGGCCGC<br/> CACCGTCTGGGCATGGACGAGCGGTACAAGGGTAC<br/> CAAGCAGAGAAATGAAGACTTCAGAAAGCTCTTTAA<br/> GCAGCTTCCAGACACGGAGCGCCTCATTGTTGATTA<br/> CTCATGTGCACTCCAAAGAGACATTCTCCTTCAGGG<br/> CCGACTCTACCTCTCTGAAAATTGGATCTGCTTCTAC<br/> AGCAACATCTCCGCTGGGAAACTCTGCTGACAGTC<br/> CGTTTCAAAGACATCTGTTCCATGACTAAAGAAAAA<br/> CAGCTCGCCTCATTCCAATGCCATCCAAGTTTGCA<br/> CTGATTCAGAAAAGCACTTCTTCACTTCGTTTCTCGC<br/> CCGGGATAGGACATATATGATGATGTTCCGGCTCTG<br/> GCAGAATGCTCTCCTTAAAAGTGAGGATCCACCGG<br/> A</p> | <p>This paper</p> | <p>EcoRI_GB-GRAM-<br/>H_BamHI</p> |
|---------------------------------------------------------------------------------------------------------------------------------------------------------------------------------------------------------------------------------------------------------------------------------------------------------------------------------------------------------------------------------------------------------------------------------------------------------------------------------------------------------------------------------------------------------------------------------------------------------------------------------------------------------------------------------------------------------------------------------------------------------------------------------------------------------------------------------------------------------------------------------------------------------------------------------------------------------------------------------------------------------------------------------------------------------------------------------------------------------------------------------------------------------------------------------------------------------------------------------------------------------------------------------------------------|-------------------|-----------------------------------|

|                                                                                                                                                                                                                                                                                                                                                                                                                                                                                                                                                                                                                                                                                                                                                                                                                                                                                                                                                                                                                                                                                                                                                                                                                                |                    |                           |
|--------------------------------------------------------------------------------------------------------------------------------------------------------------------------------------------------------------------------------------------------------------------------------------------------------------------------------------------------------------------------------------------------------------------------------------------------------------------------------------------------------------------------------------------------------------------------------------------------------------------------------------------------------------------------------------------------------------------------------------------------------------------------------------------------------------------------------------------------------------------------------------------------------------------------------------------------------------------------------------------------------------------------------------------------------------------------------------------------------------------------------------------------------------------------------------------------------------------------------|--------------------|---------------------------|
| GGGCCTGAATTCGTGAGCAAGGGCGAGGAGACCAT<br>CAAAGAGTTCATGCGCTTCAAGGTGCGCATGGAGGG<br>CTCCATGAACGGCCACGAGTTCGAGATCGAGGGCG<br>AGGGCGAGGGCCGCCCTACGAGGGCACCCAGAC<br>CGCCAAGCTGAAGGTGACCAAGGGCGGCCCTGC<br>CCTTCGCTGGGACATCCTGTCCCCCAGTTCATGT<br>ACGGCTCCGAGGCGTACGTGAGGCACCCCGCCGAC<br>ATCCCCGATTACAAGAAGCTGCCCTTCCCCGAGGGC<br>TTCAAGTGGGAGCGCGTGATGAACTTCGAAGACGGC<br>GGTCTGGTGACCGTTACCCAGGACTCCTCCCTGCAG<br>GACGGCACGCTGATCTGCAAGGTGAAGATGCGCGG<br>CACCAACTTCCCCCGACGGCCCCGTAATGCAGAA<br>GAAGACCATGGGCTGGGAGGCCTCCACCGAGATGC<br>TGTACCCCGAAGACGGCGTGCTGAAGGGCCATAGC<br>TATCAGGCCCTGAAGCTGAAGGACGGCGGCCACTA<br>CCTGGTGGAGTTCGAGACCATCTACATGGCCAAGAA<br>GCCCCGTGCAACTGCCCGGCGATTACTGTGTGGACA<br>CCAAGCTGGACATCACCTCCCACAACGAGGACTACA<br>CCATCGTGGAACAGTACGGGCGCTCCGAGGGCCGC<br>CACCGTCTGGGCATGGACGAGCGGTACAAGGGTAC<br>CAAGCAGAGAAATGAAGACTTCAGAAAGCTCTTTAA<br>GCAGCTTCCAGACACGGAGCGCCTCATTGTTGATTA<br>CTCATGTGCACTCCAAAGAGACATTCTCCTTCAGGG<br>CCGACTCTACCTCTCTGAAAATTGGATCTGCTTCTAC<br>AGCAACATCTCCGCTGGGAAACTCTGCTGACAGTC<br>CGTTTGAAGACATCTGTTCCATGACTAAAGAAAAA<br>CAGCTCGCCTCATTCCCAATGCCATCCAAGTTTGCA<br>CTGATTCAGAAAAGCACTTCTTCACTTCGTTTTGGGC<br>CCGGGATAGGACATATATGATGATGTTCCGGCTCTG<br>GCAGAATGCTCTCCTTGAAAAGTGAGGATCCACCGG<br>A | This paper         | EcoRI_GB-GRAM-<br>W_BamHI |
| GCGCTACCGGTCGCCACCATGGTGAGCAAGGGCGA<br>GGAGACC                                                                                                                                                                                                                                                                                                                                                                                                                                                                                                                                                                                                                                                                                                                                                                                                                                                                                                                                                                                                                                                                                                                                                                                 | This paper         | AgeI-GB3-NS               |
| CTGCAGAATTCTCACTTTTCAAGGAGAGCATTCTGCC<br>AG                                                                                                                                                                                                                                                                                                                                                                                                                                                                                                                                                                                                                                                                                                                                                                                                                                                                                                                                                                                                                                                                                                                                                                                    | This paper         | EcoRI-stop-<br>GRAM1b-AS  |
| CAGGGGGATCCACTTACCATGGTTCCTTTGTCTCAA<br>GAAGAATCC                                                                                                                                                                                                                                                                                                                                                                                                                                                                                                                                                                                                                                                                                                                                                                                                                                                                                                                                                                                                                                                                                                                                                                              | This paper         | BamHI-BlastR-NS           |
| TTAAAGGTACCTTAGCCCTCCCACACATAACCAGAG                                                                                                                                                                                                                                                                                                                                                                                                                                                                                                                                                                                                                                                                                                                                                                                                                                                                                                                                                                                                                                                                                                                                                                                           | This paper         | KpnI-BlastR-CAS           |
| AGGGGGATCCACTTACCATGATTGAACAAGATGGAT<br>TGCACGCAG                                                                                                                                                                                                                                                                                                                                                                                                                                                                                                                                                                                                                                                                                                                                                                                                                                                                                                                                                                                                                                                                                                                                                                              | This paper         | BamHI-NeoR-NS             |
| TTAAAGGTACCTCAGAAGAACTCGTCAAGAAGGCGA<br>TAG                                                                                                                                                                                                                                                                                                                                                                                                                                                                                                                                                                                                                                                                                                                                                                                                                                                                                                                                                                                                                                                                                                                                                                                    | This paper         | KpnI-NeoR-CAS             |
| mA*mA*mU*rGrArCrUrUrGrArUrArGrCrUrArArGrCrArGr<br>UrUrUrUrArGrArGrCrUrArGrArArUrArGrCrArArGrUrUr<br>ArArArArUrArArGrGrCrUrArGrUrCrCrGrUrUrArUrCrArAr<br>CrUrUrGrArArArArGrUrGrGrCrArCrCrGrArGrUrCrGrGr<br>UrGrCmU*mU*mU*rU                                                                                                                                                                                                                                                                                                                                                                                                                                                                                                                                                                                                                                                                                                                                                                                                                                                                                                                                                                                                     | This paper         | OSBP-sgRNA#1              |
| mG*mC*mU*rCrGrArGrGrUrUrUrCrUrUrCrCrArGrUrGr<br>UrUrUrUrArGrArGrCrUrArGrArArUrArGrCrArArGrUrUr<br>ArArArArUrArArGrGrCrUrArGrUrCrCrGrUrUrArUrCrArAr<br>CrUrUrGrArArArArGrUrGrGrCrArCrCrGrArGrUrCrGrGr<br>UrGrCmU*mU*mU*rU                                                                                                                                                                                                                                                                                                                                                                                                                                                                                                                                                                                                                                                                                                                                                                                                                                                                                                                                                                                                       | This paper         | OSBP-sgRNA#2              |
| <b>Recombinant DNA</b>                                                                                                                                                                                                                                                                                                                                                                                                                                                                                                                                                                                                                                                                                                                                                                                                                                                                                                                                                                                                                                                                                                                                                                                                         |                    |                           |
| pNIC28-Bsa4 His-GRAM1b <sub>92-207</sub> (GRAM1b)                                                                                                                                                                                                                                                                                                                                                                                                                                                                                                                                                                                                                                                                                                                                                                                                                                                                                                                                                                                                                                                                                                                                                                              | Ercan et al (2021) | BE36                      |
| pNIC28-Bsa4 His-GRAM1b (G187L)                                                                                                                                                                                                                                                                                                                                                                                                                                                                                                                                                                                                                                                                                                                                                                                                                                                                                                                                                                                                                                                                                                                                                                                                 | Ercan et al (2021) | BE99                      |
| pNIC28-Bsa4 His-GRAM1b (G187W)                                                                                                                                                                                                                                                                                                                                                                                                                                                                                                                                                                                                                                                                                                                                                                                                                                                                                                                                                                                                                                                                                                                                                                                                 | This paper         | D124                      |
| pNIC28-Bsa4 mCherry-D4H                                                                                                                                                                                                                                                                                                                                                                                                                                                                                                                                                                                                                                                                                                                                                                                                                                                                                                                                                                                                                                                                                                                                                                                                        | Ercan et al (2021) | D148                      |
| EGFP-GRAM1b                                                                                                                                                                                                                                                                                                                                                                                                                                                                                                                                                                                                                                                                                                                                                                                                                                                                                                                                                                                                                                                                                                                                                                                                                    | Naito et al (2019) | D2                        |
| EGFP-GRAM1b (G187L) (EGFP-GRAM-H)                                                                                                                                                                                                                                                                                                                                                                                                                                                                                                                                                                                                                                                                                                                                                                                                                                                                                                                                                                                                                                                                                                                                                                                              | Ercan et al (2021) | BE84                      |

|                                                           |                    |        |
|-----------------------------------------------------------|--------------------|--------|
| EGFP-GRAM <sub>1b</sub> (G187K)                           | Ercan et al (2021) | D59    |
| EGFP-GRAM <sub>1b</sub> (G187W) (EGFP-GRAM-W)             | Ercan et al (2021) | D60    |
| EGFP-GRAM <sub>1b</sub> (G187R)                           | Ercan et al (2021) | D76    |
| EGFP-GRAM <sub>1b</sub> (G187H)                           | Ercan et al (2021) | D77    |
| EGFP-GRAM <sub>1b</sub> (G187D)                           | Ercan et al (2021) | D78    |
| EGFP-GRAM <sub>1b</sub> (G187E)                           | Ercan et al (2021) | D79    |
| EGFP-GRAM <sub>1b</sub> (G187S)                           | Ercan et al (2021) | D80    |
| EGFP-GRAM <sub>1b</sub> (G187T)                           | Ercan et al (2021) | D81    |
| EGFP-GRAM <sub>1b</sub> (G187N)                           | Ercan et al (2021) | D82    |
| EGFP-GRAM <sub>1b</sub> (G187Q)                           | Ercan et al (2021) | D83    |
| EGFP-GRAM <sub>1b</sub> (G187C)                           | Ercan et al (2021) | D84    |
| EGFP-GRAM <sub>1b</sub> (G187P)                           | Ercan et al (2021) | D85    |
| EGFP-GRAM <sub>1b</sub> (G187A)                           | Ercan et al (2021) | D86    |
| EGFP-GRAM <sub>1b</sub> (G187V)                           | Ercan et al (2021) | D87    |
| EGFP-GRAM <sub>1b</sub> (G187I)                           | Ercan et al (2021) | D88    |
| EGFP-GRAM <sub>1b</sub> (G187M)                           | Ercan et al (2021) | D89    |
| EGFP-GRAM <sub>1b</sub> (G187F)                           | Ercan et al (2021) | D90    |
| EGFP-GRAM <sub>1b</sub> (G187Y)                           | Ercan et al (2021) | D91    |
| PM-FRB-mCherry                                            | Naito et al (2019) | TN133  |
| miRFP-FKBP-GRAMD1b                                        | Naito et al (2019) | TN60   |
| miRFP-FKBP-GRAMD1b (5P)                                   | Naito et al (2019) | TN67   |
| EGFP-D4H                                                  | Naito et al (2019) | LK59   |
| pLJM1-EGFP                                                | Addgene            | 19319  |
| pLJM1-EGFP-GRAM <sub>1b</sub>                             | Ercan et al (2021) | TN208  |
| pLJM1-EGFP-GRAM <sub>1b</sub> (G187L) (pLJM1-EGFP-GRAM-H) | Ercan et al (2021) | TN209  |
| pLJM1-EGFP-GRAM <sub>1b</sub> (G187W) (pLJM1-EGFP-GRAM-W) | This paper         | D150   |
| mRuby-OSBP                                                | Naito et al (2019) | D42    |
| mCherry-C1                                                | De Camilli lab     | YS300  |
| mCherry-OSBP                                              | This paper         | D184   |
| mCherry-OSBP (CRISPR-R)                                   | This paper         | D204   |
| pLJM1-mCherry-OSBP                                        | This paper         | D208   |
| pEGFP-C1                                                  | De Camilli lab     | YS276  |
| RA-NES                                                    | Addgene            | 61019  |
| Lck-mScarlet-I                                            | Addgene            | 98821  |
| pLJC6-3HXA-TMEM192                                        | Addgene            | 104434 |
| pLJM1-EGFP-BlastR                                         | This paper         | MY5    |
| PM-RA                                                     | This paper         | TN397  |
| pLJM1-PM-RA-BlastR                                        | This paper         | MY11   |
| pLJM1-EGFP-NeoR                                           | This paper         | MY6    |
| B-GRAM-W                                                  | This paper         | TN409  |
| B-GRAM-H                                                  | This paper         | TN408  |
| pLJM1-B-GRAM-W-NeoR                                       | This paper         | MY10   |
| pLJM1-B-GRAM-H-NeoR                                       | This paper         | MY9    |
| pMD2.G                                                    | Addgene            | 12259  |
| pRSV-REV                                                  | Addgene            | 12253  |
| pMDL/pRRE                                                 | Addgene            | 12251  |
| mCherry-C1                                                | De Camilli lab     | YS300  |
| iRFP-P4M                                                  | De Camilli lab     | YS313  |
| mCherry-Lact-C2                                           | De Camilli lab     | YS182  |
| iRFP-PH-PLC $\delta$ 1                                    | De Camilli lab     | YS174  |
| pLAMP1-miRFP703                                           | Addgene            | 79998  |
| LAMP1-mRFP-FLAG                                           | Addgene            | 34611  |

| <b>Software and Algorithms</b> |                                                                          |                                                                     |
|--------------------------------|--------------------------------------------------------------------------|---------------------------------------------------------------------|
| Prism 8.0.1                    | Graph Pad                                                                |                                                                     |
| PyMoL                          | The PyMOL Molecular Graphics System, Version 1.2r3pre, Schrödinger, LLC. |                                                                     |
| ImageJ Fiji                    | Schneider et al., (2012)                                                 | <a href="https://imagej.nih.gov/ij/">https://imagej.nih.gov/ij/</a> |
| <b>Other</b>                   |                                                                          |                                                                     |
| 100 nm NanoSizer Extruder      | T&T Scientific                                                           | TT-002-0001                                                         |
